# Supplementary material for: Genetic predisposition to acute kidney injury – a systematic review
Source: PubMed Central journal article supplement (PMC4667497; doi:10.1186/s12882-015-0190-6), 2015-12-02
Supplement: 12882_2015_190_MOESM1_ESM.pdf [file 12882_2015_190_MOESM1_ESM.pdf]

Additional file 1. Search Strategy in Ovid Medline, March 5<sup>th</sup> 2015

1 exp Acute Kidney Injury/

2 (acute adj2 kidney\* adj2 failur\*).mp

3 (acute adj2 kidney\* adj2 injur\*).mp

4 (acute adj2 kidney\* adj2 insufficien\*).mp

5 (acute adj2 renal\* adj2 failur\*).mp

6 (acute adj2 renal\* adj2 injur\*).mp

7 (acute adj2 renal\* adj2 insufficien\*).mp

8 aki.mp

9 (arf and (renal\* or kidney\*)).mp

10 (acute adj2 nephropath\*).mp

11 (acute adj2 nefropath\*).mp

12 exp Genetics/

13 exp Genetic Phenomena/

14 (gene or genes\* or genet\* or hered\* or genotyp\* or phenotyp\* or polymorph\* or allelis\*).mp,fs

15 1 or 2 or 3 or 4 or 5 or 6 or 7 or 8 or 9 or 10 or 11

16 12 or 13 or 14

17 15 and 16

18 limit to humans

19 limit to years 2000-present
