# Supplementary material for: Genetic predisposition to acute kidney injury – a systematic review
Source: PubMed Central journal article supplement (PMC4667497; doi:10.1186/s12882-015-0190-6), 2015-12-02
Supplement: 12882_2015_190_MOESM2_ESM.pdf [file 12882_2015_190_MOESM2_ESM.pdf]

Additional file 2. Search strategy in Embase, March 5<sup>th</sup> 2015

S1

EMB.EXACT.EXPLODE("acute kidney failure")

OR (acute NEAR/2 kidney\* NEAR/2 failur\*)

OR (acute NEAR/2 kidney\* NEAR/2 injur\*)

OR (acute NEAR/2 kidney\* NEAR/2 insufficien\*)

OR (acute NEAR/2 renal\* NEAR/2 failur\*)

OR (acute NEAR/2 renal\* NEAR/2 injur\*)

OR (acute NEAR/2 renal\* NEAR/2 insufficien\*)

OR aki

OR (arf AND (renal\* OR kidney\*))

OR ((acute NEAR/2 nephropath\*))

OR (acute NEAR/2 nefropath\*))

S2

EMB.EXACT.EXPLODE("genetics")

OR EMB.EXACT.EXPLODE("heredity")

OR (gene or genes\* or genet\* or hered\* or genotyp\* or phenotyp\* or polymorph\* or allelis\*)

S3

(S1 AND S2)

AND (subt.exact("human"))

AND pd(20000101-20150305))
