# Supplementary material for: Genetic predisposition to acute kidney injury – a systematic review
Source: PubMed Central journal article supplement (PMC4667497; doi:10.1186/s12882-015-0190-6), 2015-12-02
Supplement: 12882_2015_190_MOESM4_ESM.pdf [file 12882_2015_190_MOESM4_ESM.pdf]

Additional file 4. Articles studying AKI susceptibility.

| First author               | Year | Study design              | Site, acquisition period               | Clinical setting                  | Polymorphisms studied                                                                                                                                                                                                             | Number of patients | Number of patients with AKI | Percentage | Ethnicity     | Endpoint studied                                                                                               | Definition of AKI                                                                                                   | Intermediate phenotype association               | Total quality score |
|----------------------------|------|---------------------------|----------------------------------------|-----------------------------------|-----------------------------------------------------------------------------------------------------------------------------------------------------------------------------------------------------------------------------------|--------------------|-----------------------------|------------|---------------|----------------------------------------------------------------------------------------------------------------|---------------------------------------------------------------------------------------------------------------------|--------------------------------------------------|---------------------|
| Alam, A. [1]               | 2010 | Prospective case-control  | Multi center (2), 2003-2007            | Hospitalized with AKI             | <i>PNMT</i> -161 G/A (rs876493), <i>PNMT</i> 1543 A/G (rs5638)                                                                                                                                                                    | 961                | 194                         | 20.19 %    | Caucasian     | Increase in serum creatinine at enrollment, according to modified AKIN criteria                                | AKIN criteria                                                                                                       | Urine adrenaline and noradrenaline concentration | 4                   |
| Albert, C. [2]             | 2014 | Prospective cohort        | Multi center                           | Elective cardiac surgery with CPB | <i>COMT</i> -Val158Met (rs4680)                                                                                                                                                                                                   | 195                | 22                          | 11.28%     | Not specified | Postoperative AKI according to the RIFLE criteria                                                              | RIFLE criteria                                                                                                      | Not specified                                    | 8                   |
| Boehm, J. [3]              | 2014 | Prospective cohort        | Single center                          | Elective cardiac surgery with CPB | <i>APOE</i> e2/e3/e4 (rs429358 & rs7412), <i>TNFA</i> -308 G/A (rs1800629)                                                                                                                                                        | 1415               | 250                         | 17.67%     | Caucasian     | CSA-AKI according to RIFLE criteria (no Failure group)                                                         | RIFLE criteria (without Failure group)                                                                              | Not specified                                    | 6                   |
| Cardinal-Fernández, P. [4] | 2013 | Prospective cohort        | Single center, 2005-2008               | ICU with severe sepsis            | <i>ACE</i> I/D (rs4646994), <i>TNFA</i> -376 G/A (rs1800750), -308 G/A (rs1800629), -238 G/A (rs361525), <i>IL-8</i> -251 T/A (rs4073), <i>VEGF</i> +405 G/C (rs2010963), +936 C/G (rs3025039), <i>PBEF</i> -1001 T/G (rs9770242) | 139                | 65                          | 46.76%     | White         | R, I or F category according to RIFLE criteria during ICU stay                                                 | RIFLE criteria                                                                                                      | Not specified                                    | 8                   |
| Chang, C. [5]              | 2013 | Prospective case-control  | Single center, 2008-2010               | PCI with CM                       | <i>TNFA</i> -308 G/A (rs1800629) + 2 polymorphisms (rs1799964, rs1800630), <i>IL-10</i> -1082 G/A (rs1800896) + 3 polymorphisms (rs1554286, rs3021094, rs3790622)                                                                 | 508                | 53                          | 10.43%     | Not specified | CIN, defined as increase in serum Cr of $\geq 0.5$ mg/dl or a 25% increase from baseline, within 48h after PCI | Increase in serum Cr of $\geq 0.5$ mg/dl or a 25% increase from baseline, within 48h after PCI                      | Baseline plasma IL-10 and TNF- $\alpha$          | 6                   |
| Chew, S. [6]               | 2000 | Prospective cohort        | Single center, 1989-1999               | Post-CABG                         | <i>APOE</i> e2/e3/e4 (rs429358 & rs7412)                                                                                                                                                                                          | 564                | 2                           | 0.35 %     | Not specified | Change in serum creatinine as continuous variable: Peak serum creatinine, perioperative difference             | Not defined                                                                                                         | Not specified                                    | 5                   |
| Dalboni, M. [7]            | 2013 | Prospective case-control  | Single center                          | ICU                               | <i>TNFA</i> -308 G/A (rs1800629), <i>IL-6</i> -174 G/C (rs1800795), <i>IL-10</i> -1082 G/A (rs1800896)                                                                                                                            | 303                | 139                         | 45.87%     | Not specified | According to AKIN and RIFLE criteria                                                                           | Threefold increase of serum creatinine compared with baseline or creatinine clearance $< 60$ ml/min/mm <sup>3</sup> | Not specified                                    | 6                   |
| du Cheyron, D. [8]         | 2008 | Prospective cohort        | Single center, 2006                    | ICU                               | <i>ACE</i> I/D (rs4646994)                                                                                                                                                                                                        | 180                | 73                          | 40.56 %    | Caucasian     | According to RIFLE-criteria during ICU stay                                                                    | RIFLE criteria                                                                                                      | Serum ACE level                                  | 9                   |
| Frank, A. [9]              | 2012 | Retrospective case-cohort | Multi center (2), 1999-2009, 2007-2009 | ICU with septic shock             | GWAS                                                                                                                                                                                                                              | 887                | 459                         | 51.75 %    | Caucasian     | According to AKIN criteria (creatinine) within first 72h of ICU admission                                      | AKIN criteria                                                                                                       | Not specified                                    | 10                  |

|                               |      |                    |                             |                                                    |                                                                                                                                                                                                                                                                                  |      |     |         |                                      |                                                                                                                       |                                                                                   |                                                                                                              |   |
|-------------------------------|------|--------------------|-----------------------------|----------------------------------------------------|----------------------------------------------------------------------------------------------------------------------------------------------------------------------------------------------------------------------------------------------------------------------------------|------|-----|---------|--------------------------------------|-----------------------------------------------------------------------------------------------------------------------|-----------------------------------------------------------------------------------|--------------------------------------------------------------------------------------------------------------|---|
| <b>Haase-Fielitz, A.</b> [10] | 2009 | Prospective cohort | Single center               | Post cardiopulmonary bypass                        | COMT 472G/A (Val108/158Met, rs4680)                                                                                                                                                                                                                                              | 260  | 53  | 20.38 % | Caucasian                            | Increase in serum creatinine >50% in 5 days according to modified RIFLE criteria                                      | RIFLE criteria                                                                    | Plasma norepinephrine, epinephrine, L-DOPA, DHPG concentrations at baseline, 6, 24 h                         | 8 |
| <b>Hena-Martínez, A.</b> [11] | 2013 | Prospective cohort | Single center, 2002-2007    | Hospitalized with <i>Enterobacteriaceae</i> sepsis | 69 SNPs in 6 genes ( <i>PTCH1</i> , <i>PTCH2</i> , <i>GLI1</i> , <i>SMO</i> , <i>HHIP</i> , <i>SUFU</i> ) (rs10786691, rs12414407, rs10748825, rs10748827, rs7078511, rs2296590, rs7907760 in <i>SUFU</i> )                                                                      | 159  | 12  | 7.54%   | 72% Caucasian, 28% African American, | Creatinine levels as continuous variable and an indicator of renal function and organ injury                          | Not defined                                                                       | Not specified                                                                                                | 6 |
| <b>Isbir, S.</b> [12]         | 2007 | Prospective cohort | 2004-2006                   | Post-CABG                                          | <i>ACE</i> I/D (rs4646994), <i>APOE</i> e2, e3, e4, (rs429358 & rs7412), <i>AGTR1</i> 1166 A/C (rs5186)                                                                                                                                                                          | 248  | 54  | 21.77 % | Not specified                        | According to RIFLE criteria                                                                                           | RIFLE criteria                                                                    | Plasma level of ACE                                                                                          | 5 |
| <b>Jouan, J.</b> [13]         | 2012 | Prospective cohort | Single center               | Post cardiopulmonary bypass                        | <i>LTA</i> 252 A/G (rs909253), <i>Cys13Arg</i> (rs2229094), <i>TNF</i> 308 G/A (rs1800629), <i>IL6</i> -597 G/A (rs1800797), 572 G/C (rs1800796), -174 G/C (rs1800795), <i>IL10</i> -592 C/A (rs1800872), *117 C/T (rs3024496), <i>APOE</i> 388 T/C, 526 C/T (rs429358 & rs7412) | 126  | 8   | 6.35 %  | Not specified                        | Plasma creatinine level >200mikromol/l or requirement for dialysis at any time after surgery                          | Plasma creatinine levels greater than 200 mikromol/l, requirement of hemodialysis | Plasma concentrations of IL-6, IL-10 and TNF $\alpha$                                                        | 5 |
| <b>Kornek, M.</b> [14]        | 2013 | Prospective cohort | Single center, 2006-2009    | Cardiac surgery with CPB                           | COMT-Val158Met (rs4680)                                                                                                                                                                                                                                                          | 1741 | 398 | 22.86%  | Not specified                        | Increase in postoperative creatinine and CSA-AKI according to RIFLE criteria                                          | RIFLE criteria                                                                    | Not specified                                                                                                | 7 |
| <b>MacKensen, G.</b> [15]     | 2004 | Prospective cohort | 1999-2000                   | Post-CABG                                          | <i>APOE</i> e4 (rs429358 & rs7412)                                                                                                                                                                                                                                               | 130  |     |         | Caucasian, African American 4.6%     | Change in serum creatinine as continuous variable: Postoperative peak serum creatinine                                | Not defined                                                                       | Not specified                                                                                                | 7 |
| <b>McBride, W.</b> [16]       | 2013 | Prospective cohort | Multi center (2)            | Elective cardiac surgery                           | <i>TNFA</i> -308 G/A (rs1800629), <i>IL-10</i> -1082 G/A (rs1800896), <i>ACE</i> I/D (rs4646994), <i>TGF<math>\beta</math>1</i> -509 C/T (rs1800469)                                                                                                                             | 408  | 49  | 12.01%  | Not specified                        | According to RIFLE criteria, eGFR drop >25%, categorized as early and late renal dysfunction                          | RIFLE criteria                                                                    | Baseline and +2h plasma IL-10 and TNF- $\alpha$ ; baseline and +24h urinary TGF $\beta$ 1, IL-1ra and TNFsr2 | 3 |
| <b>Payen, D.</b> [17]         | 2012 | Prospective cohort | Multi center (4), 2004-2005 | Severe sepsis or septic shock                      | <i>HLA-DRB1</i>                                                                                                                                                                                                                                                                  | 176  | 129 | 73.30 % | Caucasian 94%                        | According to AKIN value during first 48h                                                                              | AKIN criteria                                                                     | Monocyte HLA-DR expression, plasma cytokines (IL-6, IL-10, MIF)                                              | 4 |
| <b>Pedroso, J.</b> [18]       | 2010 | Prospective cohort | Single center, 2002, 2005   | ICU                                                | <i>ACE</i> I/D (rs4340), -262 A/T (rs4291)                                                                                                                                                                                                                                       | 153  |     | 0.00 %  | Not specified                        | Evolution of renal-SOFA score during ICU days 1-7                                                                     | Renal-SOFA                                                                        | Not specified                                                                                                | 5 |
| <b>Popov, A.</b> [19]         | 2009 | Prospective cohort | Single center               | Post cardiopulmonary bypass                        | eNOS -786 T/C (rs2070744)                                                                                                                                                                                                                                                        | 497  | 161 | 32.39 % | White                                | Reduced creatinine clearance, rise in plasma creatinine as continuous variable and postoperative dialysis requirement | Postoperative dialysis requirement                                                | Not specified                                                                                                | 6 |

|                                |      |                          |                             |                                                |                                                                                                                                                                                                                                                                            |                      |                 |                  |                                     |                                                                                                                           |                                                      |               |   |
|--------------------------------|------|--------------------------|-----------------------------|------------------------------------------------|----------------------------------------------------------------------------------------------------------------------------------------------------------------------------------------------------------------------------------------------------------------------------|----------------------|-----------------|------------------|-------------------------------------|---------------------------------------------------------------------------------------------------------------------------|------------------------------------------------------|---------------|---|
| <b>Popov, A.</b> [20]          | 2010 | Prospective cohort       | Single center, 2006-2007    | Post cardiopulmonary bypass                    | <i>EPO</i> (rs1617640)                                                                                                                                                                                                                                                     | 481                  | 152             | 31.60 %          | Caucasian                           | Highest postoperative creatinine and perioperative difference as continuous variables, postoperative dialysis requirement | Not defined                                          | Not specified | 6 |
| <b>Sole-Violan, J.</b> [21]    | 2011 | Prospective case-control | Multi center (4), 2003-2009 | Hospitalized with community acquired pneumonia | <i>FCGR2A</i> H131R/H (rs1801274), <i>FCGR3A</i> V158F (rs396991), <i>FCGR3B</i> NA1/NA2                                                                                                                                                                                   | 1262 (319 with PCAP) | 101 (with PCAP) | 31.66% (in PCAP) | Caucasoid Spanish                   | Urine output <20ml/h and/or creatinine level >2mg/dl when previously normal                                               | Urine output <20ml/h and/or creatinine level <2mg/dl | Not specified | 8 |
| <b>Stafford-Smith, M.</b> [22] | 2005 | Prospective cohort       | Single center, 1995-2002    | Post-CABG                                      | 12 out of which 7 specified: <i>ACE</i> I/D (rs4646994), <i>AGT</i> 842 T/C (rs699), <i>AGTR1</i> 1166 A/C (rs5186), <i>eNOS</i> 894 G/T (rs1799983), <i>IL-6</i> -572 G/C (rs1800796), <i>TNFA</i> -308 G/A (rs1800629), <i>APOE</i> 448 T/C, 586 C/T (rs429358 & rs7412) | 1671                 |                 | 0.00 %           | 88% Caucasian, 12% African American | Peak fractional change in postoperative serum creatine as continuous variable                                             | Not defined                                          | Not specified | 8 |

**Abbreviations:** A, Adenine; ACE, Angiotensin Converting Enzyme; *ACE*, Angiotensin Converting Enzyme gene; *AGTR1*, Angiotensin II Receptor, Type 1 gene; *AGT*, Angiotensinogen gene; AKI, Acute Kidney Injury; AKIN, Acute Kidney Injury Network; *APOE*, Apolipoprotein-E gene; Arg, Arginine; bp, Base Pair; C, Cytosine; CABG, Coronary Artery Bypass Grafting; CIN; Contrast-Induced Nephropathy; CM, Contrast Medium; *COMT*, Catechol-O-methyltransferase gene; CPB, Cardiopulmonary Bypass; CSA, Cardiac Surgery Associated; Cys, Cysteine; DHBG, DiHydroxyButylGuanine; eGFR, estimated Glomerular Filtration Rate; *eNOS*, endothelial Nitric Oxide Synthase -gene; *EPO*, Erythropoietin gene; *FCGR2A*, Receptor IIa of the Fc portion of immunoglobulin G gene; *FCGR3A*, Receptor IIIa of the Fc portion of immunoglobulin G gene; *FCGR3B*, Receptor IIIb of the Fc portion of immunoglobulin G gene; G, Guanine; *GLII*, Gli family zinc finger 1 gene; GWAS, Genome-Wide Association Study; *HHIP*, Hedgehog Interacting Protein gene; HLA-DR, Human Leukocyte Antigen – Major Histocompatibility Complex, Class II, DR; *HLA-DRB1*, Human Leukocyte Antigen – Major Histocompatibility Complex, Class II, DR beta 1 gene; ICU, Intensive Care Unit; I/D, Insertion/Deletion; IgG FC, Immunoglobulin G Fc Fragment; *IL-1ra*, Interleukin-1 receptor antagonist; *IL-6*, Interleukin-6; *IL-6*, Interleukin-6 gene; *IL-8*, Interleukin-8 gene; *IL-10*, Interleukin-10; *IL-10*, Interleukin-10 gene; L-DOPA, Levodopa; LTA, Lymphotoxin Alpha; MIF, Macrophage Migration Inhibitory Factor; Met, Methionine; *PBEF*, pre-B-cell colony-enhancing factor gene; PCAP, Pneumococcal Community-Acquired Pneumonia; PCI, Percutaneous Coronary Intervention; *PNMT*, Phenylethanolamine N-methyltransferase gene; *PTCH1*, Patched homolog 1 gene; *PTCH2*, Patched homolog 2 gene; RIFLE, Risk Injury Failure Loss of function End stage -classification; rs, RefSNP; *SMO*, Smoothened gene; SOFA, Sequential Organ Failure Assessment; T, Thymine; TGFβ1, Transforming Growth Factor beta 1; *TGFβ1*, Transforming Growth Factor beta 1 gene; TNF-α, Tumor Necrosis Factor alpha; TNFsr2, Tumor Necrosis factor alpha soluble receptor p75; *TNFA*, Tumor Necrosis Factor alpha gene; Val, Valine; *VEGF*, Vascular endothelial growth factor gene.

## References

1. Alam A, O'Connor DT, Perianayagam MC, Kolyada AY, Chen Y, Rao F, Mahata M, Mahata S, Liangos O, Jaber BL: **Phenylethanolamine N-methyltransferase gene polymorphisms and adverse outcomes in acute kidney injury.** *Nephron* 2010, **114**(4):253-259.

2. Albert C, Kube J, Haase-Fielitz A, Dittrich A, Schanze D, Zenker M, Kuppe H, Hetzer R, Bellomo R, Mertens PR, Haase M: **Pilot study of association of catechol-O-methyl transferase rs4680 genotypes with acute kidney injury and tubular stress after open heart surgery.** *Biomark med* 2014, **8**(10):1227-1238.
3. Boehm J, Eichhorn S, Kornek M, Hauner K, Prinzing A, Grammer J, Lahm H, Wagenpfeil S, Lange R: **Apolipoprotein E genotype, TNF-alpha 308G/A and risk for cardiac surgery associated-acute kidney injury in Caucasians.** *Ren Fail* 2014, **36**(2):237-243.
4. Cardinal-Fernandez P, Ferruelo A, El-Assar M, Santiago C, Gomez-Gallego F, Martin-Pellicer A, Frutos-Vivar F, Penuelas O, Nin N, Esteban A, Lorente JA: **Genetic predisposition to acute kidney injury induced by severe sepsis.** *J Crit Care* 2013, **28**(4):365-370.
5. Chang CF, Lu TM, Yang WC, Lin SJ, Lin CC, Chung MY: **Gene polymorphisms of interleukin-10 and tumor necrosis factor-alpha are associated with contrast-induced nephropathy.** *Am J Nephrol* 2013, **37**(2):110-117.
6. Chew ST, Newman MF, White WD, Conlon PJ, Saunders AM, Strittmatter WJ, Landolfo K, Grocott HP, Stafford-Smith M: **Preliminary report on the association of apolipoprotein E polymorphisms, with postoperative peak serum creatinine concentrations in cardiac surgical patients.** *Anesthesiology* 2000, **93**(2):325-331.
7. Dalboni MA, Quinto BM, Grabulosa CC, Narciso R, Monte JC, Durao M Jr, Rizzo L, Cendoroglo M, Santos OP, Batista MC: **Tumour necrosis factor-alpha plus interleukin-10 low producer phenotype predicts acute kidney injury and death in intensive care unit patients.** *Clin Exp Immunol* 2013, **173**(2):242-249.
8. du Cheyron D, Fradin S, Ramakers M, Terzi N, Guillotin D, Bouchet B, Daubin C, Charbonneau P: **Angiotensin converting enzyme insertion/deletion genetic polymorphism: its impact on renal function in critically ill patients.** *Crit Care Med* 2008, **36**(12):3178-3183.
9. Frank AJ, Sheu CC, Zhao Y, Chen F, Su L, Gong MN, Bajwa E, Thompson BT, Christiani DC: **BCL2 genetic variants are associated with acute kidney injury in septic shock\*.** *Crit Care Med* 2012, **40**(7):2116-2123.
10. Haase-Fielitz A, Haase M, Bellomo R, Lambert G, Matalanis G, Story D, Doolan L, Buxton B, Gutteridge G, Luft FC, Schunck WH, Dragun D: **Decreased catecholamine degradation associates with shock and kidney injury after cardiac surgery.** *J Am Soc Nephrol* 2009, **20**(6):1393-1403.
11. Henao-Martinez AF, Agler AH, LaFlamme D, Schwartz DA, Yang IV: **Polymorphisms in the SUFU gene are associated with organ injury protection and sepsis severity in patients with Enterobacteriaceae bacteremia.** *Infect Genet Evol* 2013, **16**:386-391.
12. Isbir SC, Tekeli A, Ergen A, Yilmaz H, Ak K, Civelek A, Zeybek U, Arsan S: **Genetic polymorphisms contribute to acute kidney injury after coronary artery bypass grafting.** *Heart Surg Forum* 2007, **10**(6):E439-44.

13. Jouan J, Golmard L, Benhamouda N, Durrleman N, Golmard JL, Ceccaldi R, Trinquart L, Fabiani JN, Tartour E, Jeunemaitre X, Menasche P: **Gene polymorphisms and cytokine plasma levels as predictive factors of complications after cardiopulmonary bypass.** J Thorac Cardiovasc Surg 2012, **144**(2):467; Aug-473.
14. Kornek M, Deutsch MA, Eichhorn S, Lahm H, Wagenpfeil S, Krane M, Lange R, Boehm J: **COMT-Val158Met-polymorphism is not a risk factor for acute kidney injury after cardiac surgery.** Dis Markers 2013, **35**(2):129-134.
15. MacKensen GB, Swaminathan M, Ti LK, Grocott HP, Phillips-Bute BG, Mathew JP, Newman MF, Milano CA, Stafford-Smith M. Perioperative Outcomes Research Group. Cardiothoracic Anesthesiology Research Endeavors (C.A.R.E.) Investigators of the Duke Heart Center: **Preliminary report on the interaction of apolipoprotein E polymorphism with aortic atherosclerosis and acute nephropathy after CABG.** Ann Thorac Surg 2004, **78**(2):520-526.
16. McBride WT, Prasad PS, Armstrong M, Patterson C, Gilliland H, Drain A, Vuylsteke A, Latimer R, Khalil N, Evans A, Cambien F, Young I: **Cytokine phenotype, genotype, and renal outcomes at cardiac surgery.** Cytokine 2013, **61**(1):275-284.
17. Payen D, Lukaszewicz AC, Legrand M, Gayat E, Faivre V, Megarbane B, Azoulay E, Fieux F, Charron D, Loiseau P, Busson M: **A multicentre study of acute kidney injury in severe sepsis and septic shock: association with inflammatory phenotype and HLA genotype.** PLoS ONE 2012, **7**(6):e35838.
18. Pedroso JA, Paskulin D, Dias FS, de Franca E, Alho CS: **Temporal trends in acute renal dysfunction among critically ill patients according to I/D and -262A > T ACE polymorphisms.** J Bras Nefrol 2010, **32**(2):182-194.
19. Popov AF, Hinz J, Schulz EG, Schmitto JD, Wiese CH, Quintel M, Seipelt R, Schoendube FA: **The eNOS 786C/T polymorphism in cardiac surgical patients with cardiopulmonary bypass is associated with renal dysfunction.** Eur J Cardiothorac Surg 2009, **36**(4):651-656.
20. Popov AF, Schulz EG, Schmitto JD, Coskun KO, Tzvetkov MV, Kazmaier S, Zimmermann J, Schondube FA, Quintel M, Hinz J: **Relation between renal dysfunction requiring renal replacement therapy and promoter polymorphism of the erythropoietin gene in cardiac surgery.** Artif Organs 2010, **34**(11):961-968.
21. Sole-Violan J, Garcia-Laorden MI, Marcos-Ramos JA, de Castro FR, Rajas O, Borderias L, Briones ML, Herrera-Ramos E, Blanquer J, Aspa J, Florido Y, Garcia-Bello MA, Ferrer-Aguero JM, Sologuren I, Rodriguez-Gallego C: **The Fc receptor IIA-H/H131 genotype is associated with bacteremia in pneumococcal community-acquired pneumonia.** Crit Care Med 2011, **39**(6):1388-1393.
22. Stafford-Smith M, Podgoreanu M, Swaminathan M, Phillips-Bute B, Mathew JP, Hauser EH, Winn MP, Milano C, Nielsen DM, Smith M, Morris R, Newman MF, Schwinn DA. Perioperative Genetics and Safety Outcomes Study (PEGASUS) Investigative Team: **Association of genetic polymorphisms with risk of renal injury after coronary bypass graft surgery.** Am J Kidney Dis 2005, **45**(3):519-530.
