# Supplementary material for: Genetic predisposition to acute kidney injury – a systematic review
Source: PubMed Central journal article supplement (PMC4667497; doi:10.1186/s12882-015-0190-6), 2015-12-02
Supplement: 12882_2015_190_MOESM5_ESM.pdf [file 12882_2015_190_MOESM5_ESM.pdf]

Additional file 5. Articles studying AKI related outcome.

| First author          | Year | Study design             | Site, acquisition period    | Clinical setting                          | Polymorphisms studied                                                                                  | Number of patients | Number of patients with AKI | Percentage | Ethnicity                         | Endpoint studied                                                                         | Definition of AKI                                                                                                | Intermediate phenotype association                                                            | Total quality score |
|-----------------------|------|--------------------------|-----------------------------|-------------------------------------------|--------------------------------------------------------------------------------------------------------|--------------------|-----------------------------|------------|-----------------------------------|------------------------------------------------------------------------------------------|------------------------------------------------------------------------------------------------------------------|-----------------------------------------------------------------------------------------------|---------------------|
| Alam, A. [1]          | 2010 | Prospective case-control | Multi center (2), 2003-2007 | Hospitalized with AKI                     | <i>PNMT</i> -161 G/A (rs876493), <i>PNMT</i> 1543 A/G (rs5638)                                         | 961                | 194                         | 20.19 %    | Caucasian                         | In-hospital mortality, dialysis administration, presence of oliguria                     | AKIN criteria                                                                                                    | Urine adrenaline and noradrenaline concentration                                              | 4                   |
| Dalboni, M. [2]       | 2013 | Prospective case-control | Single center               | ICU                                       | <i>TNFA</i> -308 G/A (rs1800629), <i>IL-6</i> -174 G/C (rs1800795), <i>IL-10</i> -1082 G/A (rs1800896) | 303                | 139                         | 45.87%     | Not specified                     | Mortality                                                                                | Threefold increase of serum creatinine compared with baseline or creatinine clearance < 60ml/min/mm <sup>3</sup> | Not specified                                                                                 | 6                   |
| du Cheyron, D. [3]    | 2008 | Prospective cohort       | Single center, 2006         | ICU                                       | <i>ACE</i> I/D (rs4646994)                                                                             | 180                | 73                          | 40.56 %    | Caucasian                         | Duration of ICU stay, mortality                                                          | RIFLE criteria                                                                                                   | Serum ACE level                                                                               | 9                   |
| Haase-Fielitz, A. [4] | 2009 | Prospective cohort       | Single center               | Post cardiopulmonary bypass               | <i>COMT</i> 472G/A (Val108/158Met, rs4680)                                                             | 260                | 53                          | 20.38 %    | Caucasian                         | Dialysis administration                                                                  | RIFLE criteria                                                                                                   | Plasma norepinephrine, epinephrine, L-DOPA, DHPG concentrations at baseline, 6, 24 h          | 8                   |
| Jaber, B. [5]         | 2004 | Prospective cohort       | Multi center (2), 1996-2000 | Intermittent hemodialysis                 | <i>TNFA</i> -308 G/A (rs1800629), <i>IL-10</i> -1082 G/A (rs1800896)                                   | 61                 | 61                          | 100.00 %   | 93% Caucasian                     | Mortality, renal recovery (discontinuation of dialysis)                                  | Not defined                                                                                                      | Ex vivo production of TNF- $\beta$ and IL-10 in a subset of patients                          | 4                   |
| Kolyada, A. [6]       | 2009 | Prospective cohort       | Multi center (3), 2003-2008 | Hospitalized with nephrology consultation | <i>HIF-1<math>\alpha</math></i> 85 C/T (rs11549465)                                                    | 241                | 241                         | 100.00 %   | 91% white, 6% black, 3% other     | Dialysis administration, in-hospital mortality, composite outcome                        | Rise in serum creatinine                                                                                         | Plasma levels of VEGF-A and Ang-2                                                             | 6                   |
| Payen, D. [7]         | 2012 | Prospective cohort       | Multi center (4), 2004-2005 | Severe sepsis or septic shock             | <i>HLA-DRB1</i>                                                                                        | 176                | 129                         | 73.30 %    | 94% Caucasian                     | Severity of AKI from mild to severe, 28 day mortality                                    | AKIN criteria                                                                                                    | Monocyte HLA-DR expression, plasma cytokines (IL-6, IL-10, MIF)                               | 4                   |
| Pedroso, J. [8]       | 2010 | Prospective cohort       | Single center, 2002, 2005   | ICU                                       | <i>ACE</i> I/D (rs4340), -262 A/T (rs4291)                                                             | 153                |                             | 0.00 %     | Not specified                     | Duration of hospital stay, mortality                                                     | Renal-SOFA                                                                                                       | Not specified                                                                                 | 5                   |
| Perianayagam, M. [9]  | 2007 | Prospective cohort       | Multi center (2), 2003-2006 | Hospitalized with ARF                     | <i>NADPH Oxidase p22phox</i> +242 C/T (rs4673), <i>catalase</i> -262 C/T (rs1001179)                   | 200                | 200                         | 100.00 %   | 90.5% white, 5.5% black, 4% other | Duration of hospital stay, dialysis administration, in-hospital death, composite outcome | Rise in serum creatinine                                                                                         | Nitrotyrosine concentration, catalase activity (measured as dismutation of hydrogen peroxide) | 7                   |

|                         |      |                                                |                                          |                                                      |                                                                                                               |               |             |                  |                               |                                                                                                |                                        |                                                                   |   |
|-------------------------|------|------------------------------------------------|------------------------------------------|------------------------------------------------------|---------------------------------------------------------------------------------------------------------------|---------------|-------------|------------------|-------------------------------|------------------------------------------------------------------------------------------------|----------------------------------------|-------------------------------------------------------------------|---|
| Perianayagam, M. [10]   | 2011 | Prospective cohort                             | Multi center (2), 2003-2010              | Hospitalized with AKI                                | CYBA -1442 G/A (rs8854), +383 G/A (rs3794624), +242 C/T (rs4673), +8897 A/T (rs4782390), +640 A/G (rs1049255) | 262           | 262         | 100%             | 91% white, 7% black, 2% other | Dialysis administration, in-hospital death, composite outcome                                  | AKIN criteria                          | Nitrotyrosine concentration, urinary levels of 15-F2t-isoprostane | 5 |
| Perianayagam, M. [11]   | 2012 | Prospective cohort in two different approaches | Multi center (2,4), 2003-2010, 2004-2011 | 1) hospitalized with AKI, 2) on-pump cardiac surgery | MPO -765 T/C (rs2243828), 157 G/T (rs7208693), 9890 A/C (rs2071409), 2149 T/C (rs2759)                        | 1) 262 2) 277 | 1) 262 2) 7 | 1) 100% 2) 2.53% | 1) 91% white 2) 95% white     | Severity of AKI, adverse clinical outcomes (dialysis administration, in-hospital death)        | Rise in serum creatinine from baseline | Plasma levels of MPO, urinary levels of 15-F2t-isoprostane        | 7 |
| Popov, A. [12]          | 2009 | Prospective cohort                             | Single center                            | Post cardiopulmonary bypass                          | eNOS -786 T/C (rs2070744)                                                                                     | 497           | 161         | 32.39 %          | White                         | Dialysis administration                                                                        | Postoperative dialysis requirement     | Not specified                                                     | 6 |
| Popov, A. [13]          | 2010 | Prospective cohort                             | Single center, 2006-2007                 | Post cardiopulmonary bypass                          | EPO (rs1617640)                                                                                               | 481           | 152         | 31.60 %          | Caucasian                     | Dialysis administration                                                                        | Not defined                            | Not specified                                                     | 6 |
| Susantitaphong, P. [14] | 2013 | Prospective cohort                             | Multi center (2), 2003-2007              | Hospitalized with AKI                                | TNFA -308 G/A (rs1800629)                                                                                     | 262           | 262         | 100%             | 91% white                     | Severity of AKI, tubular injury demonstrated by urinary NAG, KIM-1, $\beta$ -GST, $\beta$ -GST | AKIN criteria                          | Not specified                                                     | 9 |

**Abbreviations:** A, Adenine; ACE, Angiotensin Converting Enzyme gene; AKI, Acute Kidney Injury; AKIN, Acute Kidney Injury Network; Ang-2, Angiotensin-2; APOE, Apolipoprotein-E gene; ARF, Acute Renal Failure; bp, Base Pair; C, Cytosine; COMT, Catechol-O-methyltransferase gene; CYBA, Cytochrome b<sub>245</sub>,  $\alpha$  subunit gene; DHBG, DiHydroxyButylGuanine; eNOS, endothelial Nitric Oxide Synthase gene; EPO, Erythropoietin gene; G, Guanine; GST, Glutathione S-transferase; HIF-1- $\alpha$ , Hypoxia-Inducible Factor 1-alpha gene; HLA-DRB1, Human Leukocyte Antigen – Major Histocompatibility Complex, Class II, DR beta 1 gene; ICU, Intensive Care Unit; I/D, Insertion/Deletion; IL-6, Interleukin-6 gene; IL-10, Interleukin-10 gene; KIM-1, Kidney Injury Molecule-1; L-DOPA, Levodopa; Met, Methionine; MPO, Myeloperoxidase; MPO, Myeloperoxidase gene; NADPH, Nicotinamide Adenosine Dinucleotide Phosphate gene; NAG, N-acetyl- $\beta$ -D-glucosaminidase; PCAP, Pneumococcal Community-Acquired Pneumonia; PNMT, Phenylethanolamine N-methyltransferase gene; RIFLE, Risk Injury Failure Loss of function End stage -classification; rs, RefSNP; SOFA, Sequential Organ Failure Assessment; T, Thymine; TNFA, Tumor Necrosis Factor alpha gene; Val, Valine; VEGF, Vascular Endothelial Growth Factor.

## References

1. Alam A, O'Connor DT, Perianayagam MC, Kolyada AY, Chen Y, Rao F, Mahata M, Mahata S, Liangos O, Jaber BL: **Phenylethanolamine N-methyltransferase gene polymorphisms and adverse outcomes in acute kidney injury.** Nephron 2010, **114**(4):253-259.
2. Dalboni MA, Quinto BM, Grabulosa CC, Narciso R, Monte JC, Durao M Jr, Rizzo L, Cendoroglo M, Santos OP, Batista MC: **Tumour necrosis factor-alpha plus interleukin-10 low producer phenotype predicts acute kidney injury and death in intensive care unit patients.** Clin Exp Immunol 2013, **173**(2):242-249.

3. du Cheyron D, Fradin S, Ramakers M, Terzi N, Guillotin D, Bouchet B, Daubin C, Charbonneau P: **Angiotensin converting enzyme insertion/deletion genetic polymorphism: its impact on renal function in critically ill patients.** Crit Care Med 2008, **36**(12):3178-3183.
4. Haase-Fielitz A, Haase M, Bellomo R, Lambert G, Matalanis G, Story D, Doolan L, Buxton B, Gutteridge G, Luft FC, Schunck WH, Dragun D: **Decreased catecholamine degradation associates with shock and kidney injury after cardiac surgery.** J Am Soc Nephrol 2009, **20**(6):1393-1403.
5. Jaber BL, Rao M, Guo D, Balakrishnan VS, Perianayagam MC, Freeman RB, Pereira BJ: **Cytokine gene promoter polymorphisms and mortality in acute renal failure.** Cytokine 2004, **25**(5):212-219.
6. Kolyada AY, Tighiouart H, Perianayagam MC, Liangos O, Madias NE, Jaber BL: **A genetic variant of hypoxia-inducible factor-1alpha is associated with adverse outcomes in acute kidney injury.** Kidney Int 2009, **75**(12):1322-1329.
7. Payen D, Lukaszewicz AC, Legrand M, Gayat E, Faivre V, Megarbane B, Azoulay E, Fieux F, Charron D, Loiseau P, Busson M: **A multicentre study of acute kidney injury in severe sepsis and septic shock: association with inflammatory phenotype and HLA genotype.** PLoS ONE 2012, **7**(6):e35838.
8. Pedroso JA, Paskulin D, Dias FS, de Franca E, Alho CS: **Temporal trends in acute renal dysfunction among critically ill patients according to I/D and -262A > T ACE polymorphisms.** J Bras Nefrol 2010, **32**(2):182-194.
9. Perianayagam MC, Liangos O, Kolyada AY, Wald R, MacKinnon RW, Li L, Rao M, Balakrishnan VS, Bonventre JV, Pereira BJ, Jaber BL: **NADPH oxidase p22phox and catalase gene variants are associated with biomarkers of oxidative stress and adverse outcomes in acute renal failure.** J Am Soc Nephrol 2007, **18**(1):255-263.
10. Perianayagam MC, Tighiouart H, Nievergelt CM, O'Connor DT, Liangos O, Jaber BL: **CYBA Gene Polymorphisms and Adverse Outcomes in Acute Kidney Injury: A Prospective Cohort Study.** Nephron Extra 2011, **1**(1):112-123.
11. Perianayagam M, Tighiouart H, Liangos O, Kouznetsov D, Wald R, Rao F, O'Connor D, Jaber B: **Polymorphisms in the myeloperoxidase gene locus are associated with acute kidney injury related outcomes.** Kidney international 2012, **82**:909-919.
12. Popov AF, Hinz J, Schulz EG, Schmitto JD, Wiese CH, Quintel M, Seipelt R, Schoendube FA: **The eNOS 786C/T polymorphism in cardiac surgical patients with cardiopulmonary bypass is associated with renal dysfunction.** Eur J Cardiothorac Surg 2009, **36**(4):651-656.
13. Popov AF, Schulz EG, Schmitto JD, Coskun KO, Tzvetkov MV, Kazmaier S, Zimmermann J, Schondube FA, Quintel M, Hinz J: **Relation between renal dysfunction requiring renal replacement therapy and promoter polymorphism of the erythropoietin gene in cardiac surgery.** Artif Organs 2010, **34**(11):961-968.
14. Susantitaphong P, Perianayagam MC, Tighiouart H, Liangos O, Bonventre JV, Jaber BL: **Tumor necrosis factor alpha promoter polymorphism and severity of acute kidney injury.** Nephron 2013, **123**(1-2):67-73.
