# Supplementary material for: Genetic predisposition to acute kidney injury – a systematic review
Source: PubMed Central journal article supplement (PMC4667497; doi:10.1186/s12882-015-0190-6), 2015-12-02
Supplement: 12882_2015_190_MOESM6_ESM.pdf [file 12882_2015_190_MOESM6_ESM.pdf]

Additional file 6. Quality scoring of the 28 full articles.

| First author                      | Pub. year | Quality score 1 | Quality score 2 | Quality score 3 | Quality score 4 | Quality score 5 | Quality score 6 | Quality score 7 | Quality score 8 | Quality score 9 | Quality score 10 | Quality score total |
|-----------------------------------|-----------|-----------------|-----------------|-----------------|-----------------|-----------------|-----------------|-----------------|-----------------|-----------------|------------------|---------------------|
| <b>Susceptibility</b>             |           |                 |                 |                 |                 |                 |                 |                 |                 |                 |                  |                     |
| <b>Albert, C.</b> [1]             | 2014      | 0               | 1               | 1               | 1               | 1               | 1               | 0               | 1               | 1               | 1                | <b>8</b>            |
| <b>Boehm, J.</b> [2]              | 2014      | 1               | 0               | 1               | 1               | 0               | 0               | 1               | 1               | 0               | 1                | <b>6</b>            |
| <b>Cardinal-Fernández, P.</b> [3] | 2013      | 1               | 1               | 1               | 1               | 1               | 1               | 0               | 1               | 0               | 1                | <b>8</b>            |
| <b>Chang, C.</b> [4]              | 2013      | 1               | 1               | 1               | 1               | 1               | 0               | 0               | 1               | 0               | 0                | <b>6</b>            |
| <b>Chew, S.</b> [5]               | 2000      | 0               | 0               | 1               | 1               | 0               | 1               | 0               | 1               | 1               | 0                | <b>5</b>            |
| <b>Frank, A.</b> [6]              | 2012      | 1               | 1               | 1               | 1               | 1               | 1               | 1               | 1               | 1               | 1                | <b>10</b>           |
| <b>Henao-Martínez, A.</b> [7]     | 2013      | 1               | 1               | 0               | 1               | 1               | 0               | 0               | 1               | 1               | 0                | <b>6</b>            |
| <b>Isbir, S.</b> [8]              | 2007      | 0               | 0               | 1               | 1               | 0               | 0               | 0               | 1               | 1               | 1                | <b>5</b>            |
| <b>Jouan, J.</b> [9]              | 2012      | 0               | 1               | 1               | 1               | 0               | 0               | 0               | 1               | 1               | 0                | <b>5</b>            |
| <b>Kornek, M.</b> [10]            | 2013      | 0               | 1               | 1               | 1               | 0               | 0               | 1               | 1               | 1               | 1                | <b>7</b>            |
| <b>MacKensen, G.</b> [11]         | 2004      | 1               | 0               | 1               | 1               | 0               | 1               | 1               | 1               | 1               | 0                | <b>7</b>            |
| <b>McBride, W.</b> [12]           | 2013      | 0               | 0               | 1               | 0               | 0               | 0               | 0               | 1               | 0               | 1                | <b>3</b>            |
| <b>Stafford-Smith, M.</b> [13]    | 2005      | 1               | 0               | 1               | 1               | 1               | 1               | 0               | 1               | 1               | 1                | <b>8</b>            |
| <b>Sole-Violan, J.</b> [14]       | 2011      | 1               | 1               | 1               | 1               | 0               | 0               | 1               | 1               | 1               | 1                | <b>8</b>            |
| <b>Susceptibility and outcome</b> |           |                 |                 |                 |                 |                 |                 |                 |                 |                 |                  |                     |
| <b>Alam, A.</b> [15]              | 2010      | 1               | 1               | 1               | 0               | 0               | 0               | 0               | 1               | 0               | 0                | <b>4</b>            |
| <b>Dalboni, M.</b> [16]           | 2013      | 0               | 1               | 1               | 1               | 1               | 0               | 0               | 1               | 0               | 1                | <b>6</b>            |
| <b>du Cheyron, D.</b> [17]        | 2008      | 1               | 1               | 1               | 1               | 1               | 1               | 1               | 1               | 1               | 0                | <b>9</b>            |
| <b>Haase-Fielitz, A.</b> [18]     | 2009      | 1               | 1               | 1               | 1               | 1               | 1               | 0               | 1               | 1               | 0                | <b>8</b>            |
| <b>Payen, D.</b> [19]             | 2012      | 1               | 0               | 1               | 1               | 0               | 0               | 0               | 1               | 0               | 0                | <b>4</b>            |

|                                |      |      |      |      |      |      |      |      |   |      |      |          |
|--------------------------------|------|------|------|------|------|------|------|------|---|------|------|----------|
| <b>Pedroso, J.</b> [20]        | 2010 | 0    | 1    | 1    | 1    | 0    | 1    | 0    | 1 | 0    | 0    | <b>5</b> |
| <b>Popov, A.</b> [21]          | 2009 | 1    | 1    | 1    | 1    | 0    | 0    | 0    | 1 | 1    | 0    | <b>6</b> |
| <b>Popov, A.</b> [22]          | 2010 | 1    | 1    | 0    | 1    | 1    | 0    | 0    | 1 | 1    | 0    | <b>6</b> |
| <b>Outcome</b>                 |      |      |      |      |      |      |      |      |   |      |      |          |
| <b>Jaber, B.</b> [23]          | 2004 | 1    | 0    | 0    | 1    | 0    | 1    | 0    | 1 | 0    | 0    | <b>4</b> |
| <b>Kolyada, A.</b> [24]        | 2009 | 1    | 1    | 1    | 1    | 0    | 0    | 0    | 1 | 1    | 0    | <b>6</b> |
| <b>Perianayagam, M.</b> [25]   | 2007 | 1    | 1    | 1    | 1    | 1    | 1    | 0    | 1 | 0    | 0    | <b>7</b> |
| <b>Perianayagam, M.</b> [26]   | 2011 | 1    | 1    | 1    | 1    | 0    | 0    | 0    | 1 | 0    | 0    | <b>5</b> |
| <b>Perianayagam, M.</b> [27]   | 2012 | 1    | 1    | 1    | 1    | 0    | 0    | 0    | 1 | 1    | 1    | <b>7</b> |
| <b>Susantitaphong, P.</b> [28] | 2013 | 1    | 1    | 1    | 1    | 1    | 1    | 0    | 1 | 1    | 1    | <b>9</b> |
| <b>Average</b>                 |      | 0.71 | 0.71 | 0.89 | 0.93 | 0.43 | 0.43 | 0.21 | 1 | 0.61 | 0.43 | 6.36     |

#### References

1. Albert C, Kube J, Haase-Fielitz A, Dittrich A, Schanze D, Zenker M, Kuppe H, Hetzer R, Bellomo R, Mertens PR, Haase M: **Pilot study of association of catechol-O-methyl transferase rs4680 genotypes with acute kidney injury and tubular stress after open heart surgery.** *Biomark med* 2014, **8**(10):1227-1238.
2. Boehm J, Eichhorn S, Kornek M, Hauner K, Prinzing A, Grammer J, Lahm H, Wagenpfeil S, Lange R: **Apolipoprotein E genotype, TNF-alpha 308G/A and risk for cardiac surgery associated-acute kidney injury in Caucasians.** *Ren Fail* 2014, **36**(2):237-243.
3. Cardinal-Fernandez P, Ferruelo A, El-Assar M, Santiago C, Gomez-Gallego F, Martin-Pellicer A, Frutos-Vivar F, Penuelas O, Nin N, Esteban A, Lorente JA: **Genetic predisposition to acute kidney injury induced by severe sepsis.** *J Crit Care* 2013, **28**(4):365-370.
4. Chang CF, Lu TM, Yang WC, Lin SJ, Lin CC, Chung MY: **Gene polymorphisms of interleukin-10 and tumor necrosis factor-alpha are associated with contrast-induced nephropathy.** *Am J Nephrol* 2013, **37**(2):110-117.

5. Chew ST, Newman MF, White WD, Conlon PJ, Saunders AM, Strittmatter WJ, Landolfo K, Grocott HP, Stafford-Smith M: **Preliminary report on the association of apolipoprotein E polymorphisms, with postoperative peak serum creatinine concentrations in cardiac surgical patients.** *Anesthesiology* 2000, **93**(2):325-331.
6. Frank AJ, Sheu CC, Zhao Y, Chen F, Su L, Gong MN, Bajwa E, Thompson BT, Christiani DC: **BCL2 genetic variants are associated with acute kidney injury in septic shock\*.** *Crit Care Med* 2012, **40**(7):2116-2123.
7. Henaio-Martinez AF, Agler AH, LaFlamme D, Schwartz DA, Yang IV: **Polymorphisms in the SUFU gene are associated with organ injury protection and sepsis severity in patients with Enterobacteriaceae bacteremia.** *Infect Genet Evol* 2013, **16**:386-391.
8. Isbir SC, Tekeli A, Ergen A, Yilmaz H, Ak K, Civelek A, Zeybek U, Arsan S: **Genetic polymorphisms contribute to acute kidney injury after coronary artery bypass grafting.** *Heart Surg Forum* 2007, **10**(6):E439-44.
9. Jouan J, Golmard L, Benhamouda N, Durrleman N, Golmard JL, Ceccaldi R, Trinquart L, Fabiani JN, Tartour E, Jeunemaitre X, Menasche P: **Gene polymorphisms and cytokine plasma levels as predictive factors of complications after cardiopulmonary bypass.** *J Thorac Cardiovasc Surg* 2012, **144**(2):467; Aug-473.
10. Kornek M, Deutsch MA, Eichhorn S, Lahm H, Wagenpfeil S, Krane M, Lange R, Boehm J: **COMT-Val158Met-polymorphism is not a risk factor for acute kidney injury after cardiac surgery.** *Dis Markers* 2013, **35**(2):129-134.
11. MacKensen GB, Swaminathan M, Ti LK, Grocott HP, Phillips-Bute BG, Mathew JP, Newman MF, Milano CA, Stafford-Smith M, Perioperative Outcomes Research Group, Cardiothoracic Anesthesiology Research Endeavors (C.A.R.E.) Investigators of the Duke Heart Center: **Preliminary report on the interaction of apolipoprotein E polymorphism with aortic atherosclerosis and acute nephropathy after CABG.** *Ann Thorac Surg* 2004, **78**(2):520-526.
12. McBride WT, Prasad PS, Armstrong M, Patterson C, Gilliland H, Drain A, Vuylsteke A, Latimer R, Khalil N, Evans A, Cambien F, Young I: **Cytokine phenotype, genotype, and renal outcomes at cardiac surgery.** *Cytokine* 2013, **61**(1):275-284.
13. Stafford-Smith M, Podgoreanu M, Swaminathan M, Phillips-Bute B, Mathew JP, Hauser EH, Winn MP, Milano C, Nielsen DM, Smith M, Morris R, Newman MF, Schwinn DA, Perioperative Genetics and Safety Outcomes Study (PEGASUS) Investigative Team: **Association of genetic polymorphisms with risk of renal injury after coronary bypass graft surgery.** *Am J Kidney Dis* 2005, **45**(3):519-530.

14. Sole-Violan J, Garcia-Laorden MI, Marcos-Ramos JA, de Castro FR, Rajas O, Borderias L, Briones ML, Herrera-Ramos E, Blanquer J, Aspa J, Florido Y, Garcia-Bello MA, Ferrer-Aguero JM, Sologuren I, Rodriguez-Gallego C: **The Fc receptor IIA-H/H131 genotype is associated with bacteremia in pneumococcal community-acquired pneumonia.** Crit Care Med 2011, **39**(6):1388-1393.
15. Alam A, O'Connor DT, Perianayagam MC, Kolyada AY, Chen Y, Rao F, Mahata M, Mahata S, Liangos O, Jaber BL: **Phenylethanolamine N-methyltransferase gene polymorphisms and adverse outcomes in acute kidney injury.** Nephron 2010, **114**(4):253-259.
16. Dalboni MA, Quinto BM, Grabulosa CC, Narciso R, Monte JC, Durao M Jr, Rizzo L, Cendoroglo M, Santos OP, Batista MC: **Tumour necrosis factor-alpha plus interleukin-10 low producer phenotype predicts acute kidney injury and death in intensive care unit patients.** Clin Exp Immunol 2013, **173**(2):242-249.
17. du Cheyron D, Fradin S, Ramakers M, Terzi N, Guillotin D, Bouchet B, Daubin C, Charbonneau P: **Angiotensin converting enzyme insertion/deletion genetic polymorphism: its impact on renal function in critically ill patients.** Crit Care Med 2008, **36**(12):3178-3183.
18. Haase-Fielitz A, Haase M, Bellomo R, Lambert G, Matalanis G, Story D, Doolan L, Buxton B, Gutteridge G, Luft FC, Schunck WH, Dragun D: **Decreased catecholamine degradation associates with shock and kidney injury after cardiac surgery.** J Am Soc Nephrol 2009, **20**(6):1393-1403.
19. Payen D, Lukaszewicz AC, Legrand M, Gayat E, Faivre V, Megarbane B, Azoulay E, Fieux F, Charron D, Loiseau P, Busson M: **A multicentre study of acute kidney injury in severe sepsis and septic shock: association with inflammatory phenotype and HLA genotype.** PLoS ONE 2012, **7**(6):e35838.
20. Pedroso JA, Paskulin D, Dias FS, de Franca E, Alho CS: **Temporal trends in acute renal dysfunction among critically ill patients according to I/D and -262A > T ACE polymorphisms.** J Bras Nefrol 2010, **32**(2):182-194.
21. Popov AF, Hinz J, Schulz EG, Schmitto JD, Wiese CH, Quintel M, Seipelt R, Schoendube FA: **The eNOS 786C/T polymorphism in cardiac surgical patients with cardiopulmonary bypass is associated with renal dysfunction.** Eur J Cardiothorac Surg 2009, **36**(4):651-656.
22. Popov AF, Schulz EG, Schmitto JD, Coskun KO, Tzvetkov MV, Kazmaier S, Zimmermann J, Schondube FA, Quintel M, Hinz J: **Relation between renal dysfunction requiring renal replacement therapy and promoter polymorphism of the erythropoietin gene in cardiac surgery.** Artif Organs 2010, **34**(11):961-968.

23. Jaber BL, Rao M, Guo D, Balakrishnan VS, Perianayagam MC, Freeman RB, Pereira BJ: **Cytokine gene promoter polymorphisms and mortality in acute renal failure.** Cytokine 2004, **25**(5):212-219.
24. Kolyada AY, Tighiouart H, Perianayagam MC, Liangos O, Madias NE, Jaber BL: **A genetic variant of hypoxia-inducible factor-1alpha is associated with adverse outcomes in acute kidney injury.** Kidney Int 2009, **75**(12):1322-1329.
25. Perianayagam MC, Liangos O, Kolyada AY, Wald R, MacKinnon RW, Li L, Rao M, Balakrishnan VS, Bonventre JV, Pereira BJ, Jaber BL: **NADPH oxidase p22phox and catalase gene variants are associated with biomarkers of oxidative stress and adverse outcomes in acute renal failure.** J Am Soc Nephrol 2007, **18**(1):255-263.
26. Perianayagam MC, Tighiouart H, Nievergelt CM, O'Connor DT, Liangos O, Jaber BL: **CYBA Gene Polymorphisms and Adverse Outcomes in Acute Kidney Injury: A Prospective Cohort Study.** Nephron Extra 2011, **1**(1):112-123.
27. Perianayagam M, Tighiouart H, Liangos O, Kouznetsov D, Wald R, Rao F, O'Connor D, Jaber B: **Polymorphisms in the myeloperoxidase gene locus are associated with acute kidney injury related outcomes.** Kidney international 2012, **82**:909-919.
28. Susantitaphong P, Perianayagam MC, Tighiouart H, Liangos O, Bonventre JV, Jaber BL: **Tumor necrosis factor alpha promoter polymorphism and severity of acute kidney injury.** Nephron 2013, **123**(1-2):67-73.
