# Supplementary material for: Genetic predisposition to acute kidney injury – a systematic review
Source: Springer Nature journal article supplement (doi:10.1186/s12882-015-0190-6), 2015-12-01
Supplement: MOESM3 [file 9741878]

Additional file 3. Studies published only as abstracts.

| First author               | Year | Study design             | Site, acquisition period                          | Clinical setting                       | Polymorphisms studied                                                                                                                                                                                                                                                                    | Number of patients | Number of patients with AKI | Percentage | Ethnicity                   | Endpoint studied                                                                                                       |                                              | Definition of AKI                                                                                                      | Significant findings                                                                                                                       |
|----------------------------|------|--------------------------|---------------------------------------------------|----------------------------------------|------------------------------------------------------------------------------------------------------------------------------------------------------------------------------------------------------------------------------------------------------------------------------------------|--------------------|-----------------------------|------------|-----------------------------|------------------------------------------------------------------------------------------------------------------------|----------------------------------------------|------------------------------------------------------------------------------------------------------------------------|--------------------------------------------------------------------------------------------------------------------------------------------|
|                            |      |                          |                                                   |                                        |                                                                                                                                                                                                                                                                                          |                    |                             |            |                             | Susceptibility                                                                                                         | Outcome                                      |                                                                                                                        |                                                                                                                                            |
| Cardinal-Fernandez, P. [1] | 2012 | Prospective cohort       | Single center, 2005-2008                          | ICU with severe sepsis or septic shock | <i>ACE</i> I/D (rs4646994), <i>TNF-<math>\alpha</math></i> -376 (rs1800750), <i>TNF-<math>\alpha</math></i> -308 (rs1800629), <i>TNF-<math>\alpha</math></i> -238 (rs361525), <i>IL-8</i> -251 (rs 4073), <i>VEGF</i> +405 (rs 2010963), +936 (rs3025039), <i>PBEF</i> -1001 (rs9770242) | 139                | 65                          | 46.76 %    | Not specified               | RIFLE criteria                                                                                                         | Not applicable                               | RIFLE criteria                                                                                                         | <i>VEGF</i> +936 CC genotype, <i>PBEF</i> -1001 GG genotype -> AKI.                                                                        |
| Chew, S. [2]               | 2012 | Prospective cohort       | Single center                                     | Post cardiac surgery                   | <i>ACE</i> I/D (rs4646994)                                                                                                                                                                                                                                                               | 991                | 491                         | 49.55 %    | Chinese, Malay, Indian      | 25% rise in creatinine within 3 postoperative days                                                                     | Not applicable                               | 25% rise in creatinine postoperatively                                                                                 | Malay and Indian with D allele vs. Chinese -> AKI postoperatively.                                                                         |
| Claessen, B. [3]           | 2013 | Prospective cohort       | Not specified                                     | PCI patients                           | <i>MKL1</i> -184 C/T, <i>CYP3A5</i> -6986 A/G                                                                                                                                                                                                                                            | 1018               | 52                          | 5.11%      | Not specified               | Relative increase in serum creatinine of $\geq$ 25% or absolute increase in serum creatinine of $\geq$ 0.5mg/dl in 48h | Not applicable                               | Relative increase in serum creatinine of $\geq$ 25% or absolute increase in serum creatinine of $\geq$ 0.5mg/dl in 48h | <i>MKL1</i> C-184>T CT and TT associated with reduced risk of AKI, <i>CYP3A5</i> A-6986>G AG and GG associated with increased risk of AKI. |
| Frank, A. [4]              | 2010 | Prospective cohort       | Single center, 1999-2009, data reported elsewhere | ICU with septic shock                  | GWAS (887 patients)                                                                                                                                                                                                                                                                      | 1264               | 627                         | 49.60 %    | Not specified               | AKIN criteria                                                                                                          | Not applicable                               | AKIN criteria                                                                                                          | <i>BCL-2</i> variant allele of rs8094315 -> decreased risk of AKI.                                                                         |
| Kidir, V. [5]              | 2013 | Prospective case-control | Not specified                                     | Hospitalized patients                  | <i>Mn-SOD</i> Ala-9Val                                                                                                                                                                                                                                                                   | 61                 | 61                          | 100%       | Turkish                     | Not reported                                                                                                           | Not applicable                               | Not defined                                                                                                            | Differences in genotypic distribution between patients and controls.                                                                       |
| Kowalik, M. [6]            | 2014 | Prospective cohort       | Not specified                                     | Post cardio-pulmonary bypass           | SNV in <i>ICAM-1</i> , <i>IL-6</i> , <i>LBP1</i> , <i>CRP</i> , <i>NOD2</i> , <i>MASP2</i> , <i>TNF<math>\alpha</math></i> , <i>SEL-E</i> , <i>NOS3</i> , <i>TLR4</i>                                                                                                                    | 492                | Not specified               |            | Not specified               | RIFLE criteria                                                                                                         | Not applicable                               | RIFLE criteria                                                                                                         | A combination of <i>ICAM-1</i> -rs5498-GG+ <i>TNF<math>\alpha</math></i> -rs1800629-GA has higher risk of AKI.                             |
| Lagan, A. [7]              | 2010 | Prospective case-control | Single center                                     | Post cardio-pulmonary bypass           | 14 SNPs from <i>TNF</i> , <i>LTA</i> , <i>IL-6</i> , <i>IL-10</i>                                                                                                                                                                                                                        | 137                | Not specified               |            | Not specified               | Not reported                                                                                                           | Duration of stay in ICU, acute kidney injury | Not defined                                                                                                            | No reported associations to AKI.                                                                                                           |
| Meyer, N. [8]              | 2010 | Prospective cohort       | Not specified                                     | Critically ill trauma                  | GWAS                                                                                                                                                                                                                                                                                     | 414                | 72                          | 17.39 %    | Caucasian, African American | AKIN criteria within 5 days after trauma                                                                               | Not applicable                               | AKIN criteria                                                                                                          | No significant findings.                                                                                                                   |
| Yang, I. [9]               | 2011 | Prospective case-        | Not specified                                     | Bacteremia                             | 35 candidate genes                                                                                                                                                                                                                                                                       | 600                | Not specified               |            | Not specified               | Not reported                                                                                                           | Development of adverse                       | Not defined                                                                                                            | Several of the SNPs ( <i>Casp1</i> , <i>Casp4</i> , <i>Casp12</i> ,                                                                        |

|  |  |         |  |  |  |  |  |  |  |  |                                                            |  |                                                                                                                              |
|--|--|---------|--|--|--|--|--|--|--|--|------------------------------------------------------------|--|------------------------------------------------------------------------------------------------------------------------------|
|  |  | control |  |  |  |  |  |  |  |  | outcomes:<br>acute renal<br>failure by renal<br>SOFA score |  | <i>Lamn2, Cdx2, Ipo7</i> -><br>development of infection,<br>adverse outcomes: ALI,<br>ARF, coagulation, renal<br>SOFA score. |
|  |  |         |  |  |  |  |  |  |  |  |                                                            |  |                                                                                                                              |

**Abbreviations:** A, Adenine; *ACE*, Angiotensin Converting Enzyme -gene; AKI, Acute Kidney Injury; AKIN, Acute Kidney Injury Network; Ala, Alanine; ALI, Acute Lung Injury; ARF, Acute Renal Failure; *BCL-2*, B-cell CLL/lymphoma 2 -gene; C, Cytosine; *Casp*, Caspase -gene; *Cdx2*, Caudal Type Homeobox 2 -gene; *CYP3A5*, Cytochrome P450 3A5 -gene; *CRP*, C-reactive protein -gene; G, Guanine; GWAS, Genome-Wide Association Study; *ICAM-1*, Intercellular Adhesion Molecule 1 -gene; ICU, Intensive Care Unit; I/D, Insertion/Deletion; *IL-6*, Interleukin-6 -gene; *IL-8*, Interleukin-8 -gene; *IL-10*, Interleukin-10 -gene; *Ipo7*, Importin 7 -gene; *LBPI*, Upstream-binding protein 1 -gene; *LTA*, Lymphotoxin Alpha -gene; *MASP2*, Mannan-binding Lectin Serine Protease 2 -gene; *MKL1*, Megakaryoblastic Leukemia (Translocation) 1 -gene; *Mn-SOD*, Manganese Superoxide Dismutase -gene; *NOD2*, Nucleotide-binding Oligomerization Domain-containing 2 -gene; *NOS3*, Nitric Oxide Synthase 3 -gene; *PBEF*, Pre-B Cell Colony-Enhancing Factor -gene; RIFLE, Risk Injury Failure Loss of function End stage -classification; rs, RefSNP; *SEL-E*, Selectin E -gene; SNP, Single Nucleotide Polymorphism; SOFA, Sequential Organ Failure Assessment; T, Thymine; *TLR4*, Toll-like receptor 4 -gene; *TNF-α*, Tumor Necrosis Factor alpha -gene; Val, Valine; *VEGF*, Vascular Endothelial Growth Factor -gene.

## References

1. Cardinal-Fernandez P, Ferruelo A, El-Assar M, Santiago C, Gomez F, Martin-Pellicer A, Frutos-Vivar F, Penuelas O, Nin N, Esteban A, Lorente JA: **Genetic predisposition to acute kidney injury induced by severe sepsis and septic shock [abstract]**. *Intensive care medicine* 2012; **38**:103.
2. Chew S, Lian K: **Association of ace d allele with acute kidney injury in non-chinese patients after cardiac surgery in a multi-ethnic South Asian population [abstract]**. *49th ERA-EDTA Congress* 2012; .
3. Claessen BE, Syros G, Mehran R, Sanidas E, Chantziara V, Apostolidou I, Weisz G, Rabbani L, Hooper C, Dangas G: **MKL1 C-184>T and CYP3A5 A-6986>G polymorphisms are associated with contrast induced acute kidney injury after PCI**. *Journal of the American College of Cardiology* 2013, **61**(10\_S).
4. Frank A, Sheu C, Chen F, Thompson B, Christiani D: **Clinical and genetic determinants of acute kidney injury in patients with septic shock**. *Am J Respir Crit Care Med* 2010, **181**(A6818).
5. Kidir V, Uz E, Yigit A, Altuntas A, Yigit B, Inal S, Uz E, Sezer M, Yilmaz R: **Association Between Manganese Superoxide Dismutase Gene Polymorphism and Acute Kidney Injury. Poster Presentation**. *Kidney inter , Suppl* 2013, **3**(4):410-417.
6. Kowalik MM, Lango R, Chmara M, Bętlejewski P, Wasąg B, Rogowski J, Limon J: **Acute kidney injury may be associated with specific ICAM-1 and TNFα genes variance**. *Appl Cardiopulm Pathophysiol* 2014, **18**(Suppl. 1):15-16.
7. Lagan A, Hewitt R, Melley D, Hector L, Pantelidis P, Finney S, Evans T, Quinlan G: **Adverse outcomes from cardiac surgery requiring cardiopulmonary bypass: Influence of polymorphism in genes encoding a panel of cytokines [abstract]**. *Am J Respir Crit Care Med* 2010; **181**:.

8. Meyer N, Feng R, Li M, Shashaty M, Gallop R, Localio A, Bellamy S, Kaplan S, Lanke P, Fuchs B, Hakonarson H, Aplenc R, Christie J: **Large scale genotyping in a trauma cohort identifies pathways associated with acute kidney injury following trauma [abstract]**. *Am J Respir Crit Care Med* 2010; **181**:

9. Yang I, Wang L, Alper S, Schwartz D: **Association of polymorphisms in known and novel innate immune genes with gram negative bacteremia [abstract]**. *Am J Respir Crit Care Med* 2011; **183**:
